# Supplementary material for: Impact of nitrogen application and crop stage on epiphytic microbial communities on silage maize leaf surfaces
Source: PeerJ. 2023 Nov 15;11:e16386. doi: 10.7717/peerj.16386 (PMC10656910; doi:10.7717/peerj.16386)
Supplement: Supplemental Information 1 [file peerj-11-16386-s001.xlsx]

## Sheet: Sheet1
Maturity stage	N application rates （kg/hm2）	Aerobic bacteria	Lactic acid bacteria	Molds	Yeasts	Inorganic phosphorus	Soluble sugar	Soluble protein	Free amino acids	Total phenolic	pH	Water loss	Moisture retention capacity	Stomatal density	Transpiration rate	Net photosynthetic rate	Intercellular carbon dioxide concentration	Intercellular carbon dioxide partial pressure	Pore conductivity of water vapor	Total conductance of water vapor	Total conductivity of carbon dioxide (mmol m⁻² s⁻¹)
Flowering stage	160	4.39967	3.07918	2.90309	3.97313	75.975	1.96776	1.61498	469.767	540.442	7.65	1.55655	63.4569	77.9167	0.00382312	27.5963	91.0504	7.37338	0.157786	0.152778	0.095923
	160	4.47129	3.52504	3.20412	3.79239	88.975	1.62575	1.76444	655.738	545.752	7.69	1.66306	59.2647	86.875	0.00566162	30.6927	172.608	13.9779	0.251879	0.239364	0.150675
	160	4.33041	3.59106	3	4.02938	76.225	1.76658	1.21209	342.88	532.035	7.54	1.44346	61.8714	88.5417	0.00678358	39.3733	169.845	13.7527	0.327403	0.306591	0.193379
	240	4.3927	3.51188	3.07918	3.5563	71.225	1.92529	1.69296	281.859	530.265	7.48	1.38765	58.1391	95.8333	0.00450081	34.6261	82.9073	6.71316	0.195256	0.187648	0.117939
	240	4.46835	3.64836	3.34242	3.76343	82.475	1.74646	1.34855	361.284	535.575	7.36	1.45234	63.3267	88.0208	0.00512261	31.9874	140.448	11.3723	0.225564	0.215474	0.13554
	240	4.4014	3.75205	2.60206	3.91381	77.225	1.81576	1.64097	353.051	524.071	7.89	1.40668	67.7426	94.375	0.00328204	28.0934	46.6233	3.77521	0.138259	0.134396	0.0843354
	320	4.42651	3.53782	3.14613	3.82607	87.225	1.71516	1.32905	473.641	559.469	7.67	1.43355	65.5868	87.5	0.00358312	26.259	105.021	8.50411	0.157277	0.1523	0.0956216
	320	4.51455	3.6721	2.60206	4.16435	85.475	1.76658	1.17	437.319	551.504	7.88	1.38744	72.4577	84.6875	0.00688216	31.6456	232.461	18.8228	0.374434	0.347476	0.219433
	320	4.48287	3.86629	3.14613	4.10037	28.475	1.72634	1.1731	430.539	570.973	7.6	1.75655	57.9326	81.6667	0.00828871	46.8322	179.749	14.5535	0.422124	0.388204	0.245448
Dough stage	160	3.81291	2.6149	2.30103	2.43136	43.6125	1.2048	0.458223	70.7038	297.08	7.68	1.61309	53.2502	70.3125
	160	4.06258	1.64345	2.23045	2.07918	57.1125	0.870834	0.477718	53.269	395.31	7.77	1.68924	49.4006	72.5
	160	3.74036	1.86923	2.60206	2.53148	22.8625	0.649532	0.520607	50.3632	293.982	7.48	1.73253	54.6053	68.4375
	240	4.16137	1.57978	2.17609	2.75587	27.1125	0.62539	0.579091	79.4212	334.248	7.63	1.82038	55.3541	77.2917
	240	4.29776	1.5563	2.36173	2.43136	28.4875	0.70184	0.76624	71.6724	360.796	7.63	1.67223	56.0087	76.0417
	240	4.03543	0	2.32222	1.95424	29.8625	0.809138	0.645373	67.3137	343.982	7.71	1.70409	55.2929	78.75
	320	4.01494	1.53148	1.77815	2.04139	20.9875	0.613319	0.598586	80.3898	316.549	7.53	1.61189	53.9786	75.5208
	320	4.1271	0	1.8451	2.44716	31.3625	0.666968	0.462122	65.8608	152.389	7.6	1.74261	52.1282	73.4375
	320	4.26951	1.92428	2.32222	2.77085	38.8625	0.516751	0.454325	88.1386	209.912	7.59	1.73825	52.8868	76.25
